# Supplementary material for: Understanding the laser-induced aerosol ablation of sub-micron liquid particles via size-resolved spectral and image analyses
Source: Royal Society of Chemistry journal article supplement (doi:10.1039/c9ja00278b), 2019-01-01
Supplement: c9ja00278b1.pdf [file c9ja00278b1.pdf]

## Supplementary Material

### **Laser-Induced Aerosol Ablation of Sub-Micron Liquid Particles via Size Resolved Spectral and Image Analyses**

*Muhammad Sher Afgan, Sahar Sheta, Zongyu Hou, Zheng Li, and Zhe Wang\**

State Key Laboratory of Power Systems, International Joint Laboratory on Low Carbon Clean Energy Innovation, Department of Energy & Power Engineering, Tsinghua-BP Clean Energy Research & Education Centre, Tsinghua University, Beijing 100084, China.

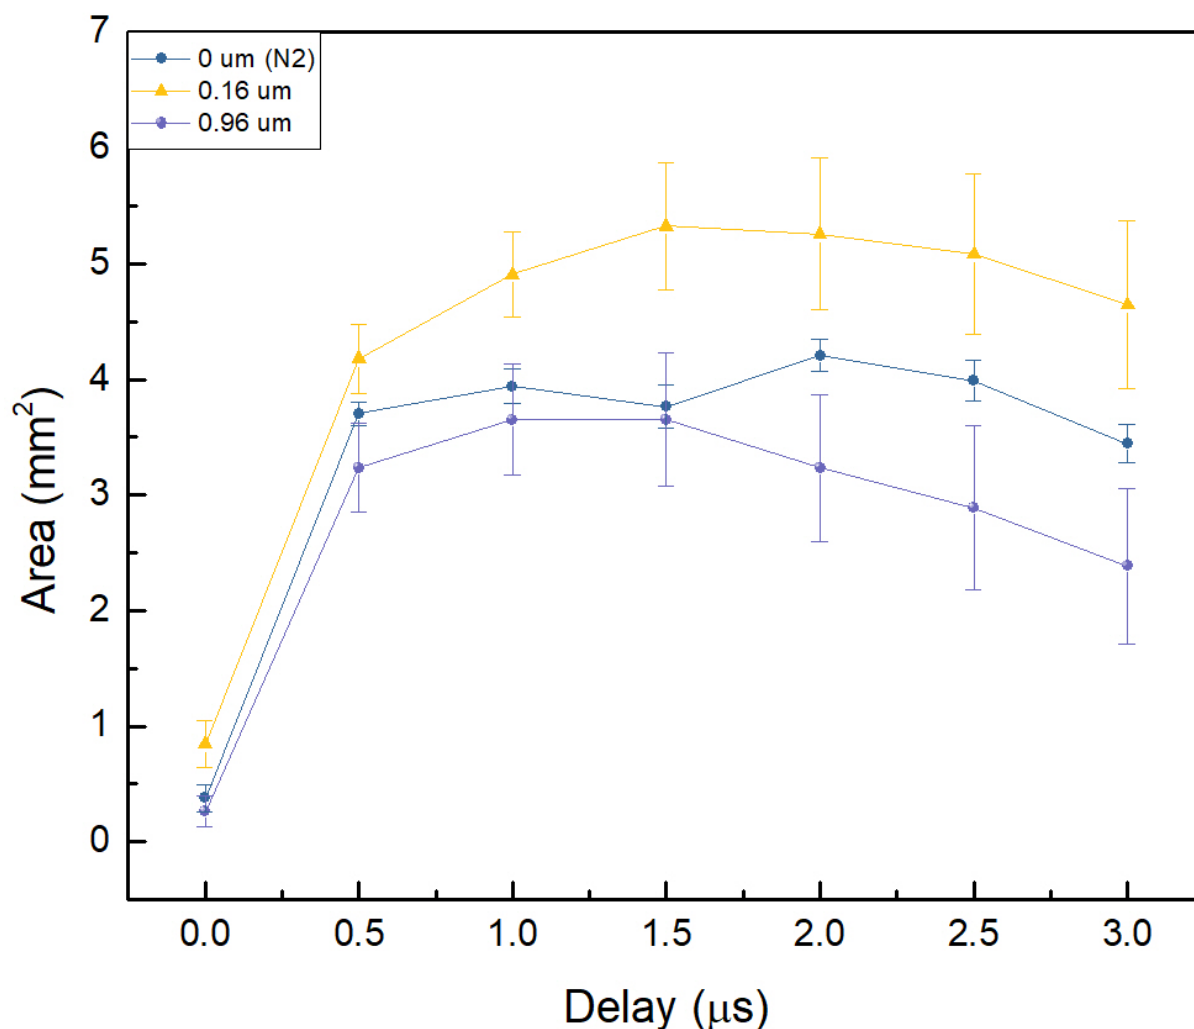

Fig. S-1 Temporal plasma expansion profile for nitrogen, minimum (0.16 μm) and maximum (0.96 μm) sizes of aerosol particles.
